# Supplementary material
Source: PubMed Central journal article supplement (PMC1698855)
Supplement: amjpathol_169_4_1376__1.pdf [file amjpathol_169_4_1376__1.pdf]

Supplement tables 1 and 2 contain lists of statistically significant differentially expressed transcripts with an unadjusted p-value cut off equal to 0.001. Transcripts are sorted based on the p-value in ascending order. Each table name includes information on two cell types compared.

Columns throughout all three spreadsheets contain the following information:

Column A - Affymetrix probe ID number;

Columns B-C - unadjusted p-value and p-values FDR adjusted according to Benjamini and Hochberg;

Columns D-E - log<sub>2</sub> signal intensity values averaged across all five technical replications;

Column F - fold change calculated based on the average signal intensity values;

Columns G and above contain all biological annotation available through NetAffx web analysis.

ochberg procedure;

s tool version of April 2004.
